# Supplementary material for: Distribution Characteristics and Geogenic Mechanisms of Riverbed Overburden in Southwest China
Source: Frontiers journal article supplement (doi:10.3389/feart.2022.895769), 2022-06-23
Supplement: Table_1.XLS [file Table_1.XLS]

## Sheet: Sheet1
	Serial number	Location	river system	Longitude	Latitude	Overburden thickness
	1	long yang xia	the Yellow River	100.92	36.1219	2.68
	2	la xi wa	the Yellow River	101.188	36.07	15
	3	ni na	the Yellow River	101.269	36.0628	15
	4	shan ping	the Yellow River	101.552	36.1179	35
	5	li jia xia	the Yellow River	101.81	36.1182	18
	6	zhi gang la ka	the Yellow River	101.947	36.0566	8
	7	kang yang	the Yellow River	101.948	36.0566	6
	8	gong bo xia	the Yellow River	102.23	35.8776	18.7
	9	su zhi	the Yellow River	102.34	35.8719	11.5
	10	huang feng	the Yellow River	102.437	35.8738	6.7
	11	ji shi xia	the Yellow River	102.707	35.8255	8
	12	da he jia	the Yellow River	102.753	35.8365	10
	13	bing ling	the Yellow River	103.011	35.8048	10
	14	liu jia xia	the Yellow River	103.346	35.9315	10
	15	yan guo xia	the Yellow River	103.275	36.0584	10
	16	ba pan xia	the Yellow River	103.411	36.1376	10
	17	xiao xia	the Yellow River	104.017	36.1465	4
	18	da xia	the Yellow River	104.164	36.3055	34.83
	19	na zi xia	the Yellow River	101.151	37.596	21.09
	20	ma dong dang	the Yellow River	100.7	34.6706	5
	21	wa yan	the Yellow River	98.2179	36.1894	84.4
	22	ci ha xia	the Yellow River	100.237	35.2704	7.5
	23	ban dong	the Yellow River	100.276	35.3096	9.6
	24	yang qu	the Yellow River	100.293	35.0809	11
	25	shi tou xia	the Yellow River	101.3	37.492	15
	26	gou hou	the Yellow River	100.583	36.3948	13
	27	yong feng	the Yellow River	102.285	35.7074	6.9
	28	pan dao	the Yellow River	101.367	36.6142	7.2
	29	hei quan	the Yellow River	101.537	37.2084	29
	30	dong da tan	the Yellow River	101.049	36.8657	18.5
	31	nan men xia	the Yellow River	101.893	36.9656	19
	32	xian mi	the Yellow River	102.002	37.2444	22.5
	33	xue long tan	the Yellow River	102.147	37.1724	16.5
	34	xiao gan gou	the Yellow River	94.7725	36.1461	4.5
	35	jin sha xia	the Yellow River	102.654	36.8322	23
	36	tie cheng gou	the Yellow River	102.734	36.7534	20
	37	lian cheng	the Yellow River	102.876	36.5194	4
	38	san cha he	the Yellow River	94.7874	35.9283	302.77
	39	na leng ge le he	the Yellow River	92.8783	36.8314	135.7
	40	jiu dian xia	the Yellow River	103.835	34.9238	56
	41	lian lu yi ji	the Yellow River	103.834	34.9798	16
	42	xia cheng	the Yellow River	103.792	34.9958	3.6
	43	ji li	the Yellow River	103.786	35.0139	5.1
	44	hai dian xia	the Yellow River	103.763	35.0963	12
	45	sai wu dong ba zhi	the Yellow River	103.023	34.6832	20
	46	sai wu dong chang zhi	the Yellow River	103.061	34.6788	24
	47	qing shui	the Yellow River	103.897	34.4527	1
	48	san jia	the Yellow River	103.811	35.1569	5
	49	lu dong tai	the Yellow River	103.243	34.6395	21.5
	50	dong jia shan	the Yellow River	103.44	34.5836	28
	51	a la shan	the Yellow River	102.629	34.5416	19.2
	52	bing qiao wan	the Yellow River	104.086	34.4717	4
	53	wu hu zha	the Yellow River	102.99	34.6711	20
	54	ru wu	the Yellow River	103.023	34.6834	25
	55	qi jia ping	the Yellow River	103.866	35.4935	6.2
	56	lu ba si	the Yellow River	103.31	34.6189	16
	57	niu zi	the Yellow River	103.372	34.6035	25
	58	xiao zu ping	the Yellow River	103.659	34.5623	3
	59	da ban	the Yellow River	103.642	35.7313	9
	60	wang jia mo	the Yellow River	103.864	35.4463	4
	61	huangshui	the Yellow River	103.08	36.2074	6.5
	62	hu jia ya	the Jialing River	104.397	33.7577	69
	63	nan yu	the Jialing River	104.419	33.7216	43
	64	sha wan chang zhi	the Jialing River	104.558	33.6133	41
	65	bao jia ba	the Jialing River	105.088	33.3159	50
	66	jiao yuan chang zhi	the Jialing River	105.103	33.238	21.2
	67	miao jia ba	the Jialing River	105.027	32.8944	35
	68	gaozi dian	the Jialing River	104.896	33.0263	65
	69	xian ya ba	the Jialing River	104.354	33.0838	73
	70	bi kou	the Jialing River	105.228	32.7577	34
	71	dong jia ba	the Jialing River	105.522	32.6951	22
	72	da la he kou	the Jialing River	103.466	33.9112	30
	73	qilinsi	the Jialing River	105.333	32.7575	24
	74	ba miao gou	the Jialing River	105.904	32.7423	28.9
	75	fei xian guan	the Jialing River	105.844	32.5473	16.8
	76	shang shi pan	the Jialing River	105.78	32.3875	23.7
	77	ting zi kou	the Jialing River	105.873	31.8159	13.5
	78	cang xi	the Jialing River	105.93	31.7572	10
	79	bao zhu si	the Jialing River	105.614	32.5175	31
	80	zi lan ba	the Jialing River	105.653	32.4194	22
	81	zhao hua	the Jialing River	105.699	32.35	21
	82	sha xi chang	the Jialing River	105.938	31.6173	5
	83	jin yin tai	the Jialing River	106.048	31.5472	8
	84	hong yan zi	the Jialing River	106.07	31.3633	24.6
	85	xin zheng	the Jialing River	106.267	31.3038	10
	86	feng yi chang	the Jialing River	106.192	30.9483	16
	87	sheng zhong	the Jialing River	105.744	31.5263	6
	88	dong xi guan	the Jialing River	106.13	30.4816	14
	89	tong zi hao	the Jialing River	106.264	30.2941	9
	90	jiu long xia	the Jialing River	103.66	33.9428	5
	91	hua yuan	the Jialing River	103.779	33.9596	2
	92	dai gu si	the Jialing River	103.942	34.0022	4
	93	ba cang	the Jialing River	104.016	33.9059	8
	94	li jie	the Jialing River	104.04	33.8868	11
	95	xi dong gou	the Jialing River	104.203	33.8523	40
	96	liang feng ke	the Jialing River	104.203	33.8523	48
	97	sha chuan ba	the Jialing River	104.33	33.7796	35
	98	dong dong	the Jialing River	103.76	33.891	9
	99	chai men guan	the Jialing River	104.37	33.0769	20
	100	bai yi ba	the Jialing River	104.63	32.971	25
	101	shang de	the Jialing River	104.754	32.9117	30
	102	jin kou ba	the Jialing River	104.893	32.8452	30
	103	han ping ju	the Jialing River	105.004	32.8369	46
	104	gong ba he kou	the Jialing River	104.25	33.4667	30.2
	105	heng dan	the Jialing River	104.848	32.8597	63
	106	dong nuo	the Jialing River	103.784	33.6139	65
	107	hei he	the Jialing River	104.035	33.4839	20
	108	ling jiang	the Jialing River	104.063	33.4043	40
	109	hei he tang	the Jialing River	104.084	33.3437	70
	110	yong le	the Jialing River	104.223	33.2778	60
	111	shuang he	the Jialing River	104.265	33.1667	35
	112	qing long	the Jialing River	104.35	33.0901	57.4
	113	yu wa	the Jialing River	103.93	33.5513	51.8
	114	lei jia he	the Jialing River	105.881	32.3872	5
	115	shuang xia hu	the Jialing River	106.066	32.7253	5
	116	ma jia	the Jialing River	104.16	33.083	50
	117	shun he	the Jialing River	104.194	33.0694	42.5
	118	da zhai	the Jialing River	105.687	32.2919	42
	119	qing chuan xian zhu yuan zhen	the Jialing River	105.349	32.2349	9.6
	120	zhang hua	the Jialing River	106.195	32.1442	5
	121	meng zi	the Jialing River	106.551	32.5691	6
	122	bian jia dong	the Jialing River	106.776	32.6826	5
	123	ying 萃	the Jialing River	106.514	32.5382	5
	124	liu jia he	the Jialing River	106.415	32.4351	7
	125	guan kou	the Jialing River	106.487	32.5912	2
	126	wan jia ju	the Jialing River	106.332	32.6402	5
	127	yan he	the Jialing River	106.335	32.6045	3
	128	guo hua	the Jialing River	106.326	32.5252	5
	129	qing zhu yuan	the Jialing River	106.285	32.4288	4
	130	ju ting	the Jialing River	106.084	33.0805	14.1
	131	shui niu jia	the Fujiang River	104.249	32.7727	30
	132	zi yi li	the Fujiang River	104.345	32.7328	80
	133	mu zuo	the Fujiang River	104.428	32.6832	83.88
	134	yin ping	the Fujiang River	104.527	32.5984	107
	135	xian nv bao	the Fujiang River	104.247	32.4855	34.3
	136	tie long bao	the Fujiang River	104.529	32.4245	12.65
	137	gu cheng	the Fujiang River	104.556	32.3901	12
	138	gao ping pu	the Fujiang River	104.74	32.3076	10
	139	xiao ping zi	the Fujiang River	104.826	32.1852	5
	140	bao ling si	the Fujiang River	104.797	32.1322	25.75
	141	wu dong	the Fujiang River	104.778	31.9149	24.25
	142	shi long zui	the Fujiang River	104.781	31.9054	6
	143	chan lin si	the Fujiang River	104.773	31.8251	8
	144	xing jia miao	the Fujiang River	104.755	31.7923	9
	145	ban zhu yuan	the Fujiang River	104.709	31.7115	11.3
	146	long feng	the Fujiang River	104.705	31.6516	15.3
	147	san jiang	the Fujiang River	104.811	31.4065	4
	148	dong gua shan	the Fujiang River	104.98	31.2567	12.6
	149	wu jia dong	the Fujiang River	105.009	31.1756	10.6
	150	ming tai	the Fujiang River	105.107	31.0958	7.9
	151	jin hua	the Fujiang River	105.3	30.9842	8
	152	luo si chi	the Fujiang River	105.369	30.8973	2.1
	153	da gu tan	the Fujiang River	105.398	30.8423	12
	154	tang jia dong	the Fujiang River	105.556	30.5774	7.3
	155	guo jun dong	the Fujiang River	105.648	30.4621	10
	156	bai chan si	the Fujiang River	105.758	30.3876	15
	157	xuan ping	the Fujiang River	104.402	31.8694	21.7
	158	ku zhu ba	the Fujiang River	104.446	31.8444	5
	159	qing ping	the Tuojiang River	104.117	31.5333	24
	160	guan kou	the Tuojiang River	103.851	31.0811	49.9
	161	jiu long tan	the Tuojiang River	104.532	30.7287	8
	162	bai guo	the Tuojiang River	104.533	30.6667	9.5
	163	huang ni tan	the Tuojiang River	105.009	29.2299	5
	164	shang you shui ku	the Tuojiang River	104.505	31.4778	30
	165	qiang yang cun gu yan sai hu	the Minjiang River	103.725	32.1102	110
	166	tian long hu	the Minjiang River	103.674	32.0358	243
	167	ji yu	the Minjiang River	103.803	31.6417	54.6
	168	ma nao ding	the Minjiang River	103.674	31.9683	60
	169	fei hong qiao	the Minjiang River	103.72	31.8286	73.4
	170	shi li pu	the Minjiang River	103.853	31.7218	96.3
	171	zhong ba （zhong ba ）	the Minjiang River	103.52	31.38	104.19
	172	yu long	the Minjiang River	103.533	31.4062	92.5
	173	cao po dong da suo qiao	the Minjiang River	103.47	31.2777	72
	174	mo dao xi	the Minjiang River	103.547	31.4253	100
	175	che di guan	the Minjiang River	103.492	31.2273	85
	176	sha ping	the Minjiang River	103.497	31.2008	83.1
	177	fu tang	the Minjiang River	103.496	31.1787	92.5
	178	xing wen ping	the Minjiang River	103.486	31.1402	62.5
	179	tai ping yi	the Minjiang River	103.489	31.1145	86
	180	zhong tan pu	the Minjiang River	103.489	31.0693	64
	181	dong jie lao	the Minjiang River	103.486	31.1133	50
	182	ying xiu wan	the Minjiang River	103.492	31.0551	62
	183	xuan kou	the Minjiang River	103.481	30.9896	33
	184	tong zhong dian zhan	the Minjiang River	103.741	31.5791	70
	185	jiang she ba	the Minjiang River	103.702	31.5584	25
	186	qing yun ping	the Minjiang River	103.555	31.0242	20
	187	zi ping pu	the Minjiang River	103.576	31.0311	18.5
	188	yu zui	the Minjiang River	103.606	31.0068	23.8
	189	cai ba min jiang te da qiao	the Minjiang River	104.515	28.7835	7
	190	qing shen minjiang da qiao	the Minjiang River	103.862	29.8348	5.6
	191	miao zi ping min jiang da qiao	the Minjiang River	103.546	31.0196	10.15
	192	mao dong gai	the Minjiang River	103.231	32.0708	50
	193	se dong gu	the Minjiang River	103.367	31.9649	46
	194	liu ping	the Minjiang River	103.57	31.8754	32
	195	yu zi xi Ⅰ	the Minjiang River	103.323	31.0726	75
	196	yu zi xi Ⅱ	the Minjiang River	103.403	31.0602	68.4
	197	xiong mao	the Minjiang River	103.186	31.0314	60
	198	shi zi ping	the Minjiang River	102.934	31.5154	101.5
	199	hong ye dong ji	the Minjiang River	103.137	31.4172	80
	200	li xian	the Minjiang River	103.155	31.4283	80
	201	xue cheng	the Minjiang River	103.3	31.5462	60.13
	202	gu cheng	the Minjiang River	103.359	31.5736	82.8
	203	sang ping	the Minjiang River	103.565	31.5106	45
	204	long xi	the Minjiang River	103.512	31.5459	42.1
	205	sha pai	the Minjiang River	103.373	31.3138	40
	206	cao po	the Minjiang River	103.417	31.309	45
	207	jian ke ba zhi	the Minjiang River	103.027	32.5461	11.07
	208	jian ke chang zhi	the Minjiang River	103.166	32.4215	21.03
	209	qing lang	the Minjiang River	103.155	32.2361	23.5
	210	xi li	the Minjiang River	103.148	32.1721	57.6
	211	mu ni	the Minjiang River	103.125	31.7001	37.9
	212	lv ye	the Minjiang River	103.193	31.6291	45
	213	guan mao zhou	the Minjiang River	103.508	28.7224	7.5
	214	huo gu	the Minjiang River	103.683	28.9329	7
	215	zhou ba	the Minjiang River	103.715	29.0878	12
	216	huang dan	the Minjiang River	103.751	29.1666	12
	217	jian wei	the Minjiang River	103.924	29.2345	15.7
	218	li jia yan	the Minjiang River	103.49	30.758	8.4
	219	bai guo gang	the Minjiang River	103.627	31.0666	34
	220	yan yun	the Minjiang River	103.34	32.6628	2.5
	221	qian fo yan	the Qingyi River	103.492	29.8035	42.6
	222	qiao qi	the Qingyi River	102.748	30.6894	72
	223	min zhi	the Qingyi River	102.879	30.5763	85.5
	224	bao xing	the Qingyi River	102.914	30.512	50
	225	xiao guan zi	the Qingyi River	102.809	30.3587	86.7
	226	tong tou	the Qingyi River	102.872	30.1612	6.22
	227	yu cheng	the Qingyi River	102.959	29.988	16.5
	228	da xing	the Qingyi River	103.046	30.0082	5
	229	shui jin guan	the Qingyi River	103.085	29.9691	6
	230	gui dong fu	the Qingyi River	103.155	29.924	10
	231	cao yu tan	the Qingyi River	103.187	29.8944	17.5
	232	gao feng shan	the Qingyi River	103.231	29.8446	14.5
	233	bai hua tan	the Qingyi River	103.295	29.8687	8
	234	cheng dong	the Qingyi River	103.41	29.8651	20
	235	wa wu shan	the Qingyi River	103.039	29.6708	6.96
	236	sha ping	the Qingyi River	103.019	29.8191	6
	237	le ying	the Qingyi River	102.853	29.9874	1.5
	238	shi yang	the Qingyi River	102.832	30.0116	13.1
	239	mao tan	the Qingyi River	103.58	29.6911	104.46
	240	chu ju gou	the Qingyi River	102.593	30.6102	85.17
	241	guo lang 跷	the Qingyi River	102.568	30.0251	27.38
	242	zhong ju	the Qingyi River	103.131	30.4827	7.28
	243	zha luo ba zhi	the Dadu River	100.802	32.765	13
	244	ya dong tang ba zhi	the Dadu River	100.783	32.7611	12.25
	245	an da ba zhi	the Dadu River	100.793	32.4605	13.5
	246	xia dong ga	the Dadu River	101.548	32.4597	25
	247	ba la	the Dadu River	101.604	32.3037	30
	248	da wei	the Dadu River	101.746	32.165	30
	249	bo si gou	the Dadu River	102.019	32.1544	30
	250	shuang jiang kou	the Dadu River	101.934	31.7914	67.8
	251	re zu	the Dadu River	102.04	31.9032	35
	252	jin chuan	the Dadu River	102.079	31.5866	80
	253	dong song	the Dadu River	101.993	31.3578	80
	254	an ning	the Dadu River	102.046	31.2926	95
	255	ma nai	the Dadu River	101.939	31.1705	135
	256	ba di	the Dadu River	101.886	31.1286	130
	257	dan ba	the Dadu River	101.869	31.0158	127.7
	258	hou zi yan	the Dadu River	102.058	30.5461	72.4
	259	chang he ba	the Dadu River	102.119	30.4036	87.1
	260	ye ba	the Dadu River	102.191	30.1928	130
	261	leng zhu guan	the Dadu River	102.161	30.051	122
	262	lu ding	the Dadu River	102.229	29.946	148.6
	263	leng qi	the Dadu River	102.222	29.7829	84
	264	jia jun	the Dadu River	102.204	29.6865	112
	265	de tuo	the Dadu River	102.176	29.5857	50
	266	da gang shan	the Dadu River	102.219	29.4486	20.9
	267	xin min	the Dadu River	102.244	29.3622	86
	268	long tou shi	the Dadu River	102.257	29.3404	77
	269	an shun chang	the Dadu River	102.287	29.2714	73
	270	lao ying yan	the Dadu River	102.349	29.2245	70
	271	han yuan	the Dadu River	102.669	29.3145	81
	272	zhao hou miao	the Dadu River	102.795	29.3065	91
	273	pu bu gou	the Dadu River	102.831	29.225	74.74
	274	shen xi gou	the Dadu River	102.986	29.2898	57.08
	275	zhen tou ba	the Dadu River	103.064	29.2217	48
	276	zhen tou ba yi ji	the Dadu River	103.047	29.2334	48
	277	gong zui	the Dadu River	103.482	29.3002	70
	278	tong jie zi	the Dadu River	103.652	29.3153	72.25
	279	huang jin ping	the Dadu River	102.174	30.1441	133.9
	280	dao ban	the Dadu River	101.983	31.1853	130
	281	ying liang bao	the Dadu River	102.172	29.6353	129.7
	282	sha ping	the Dadu River	103.225	29.2381	50
	283	sha ping dong ji	the Dadu River	103.211	29.2347	38
	284	an ning	the Dadu River	102.018	31.3023	95
	285	gan zi lin	the Dadu River	102.171	29.5149	80
	286	sha wan	the Dadu River	103.554	29.3843	77
	287	an gu	the Dadu River	103.678	29.5299	24
	288	yang sa ying	the Dadu River	102.712	29.3084	80.9
	289	tian wan （zhi liu ）	the Dadu River	102.17	29.4388	131.8
	290	ren zong hai	the Dadu River	101.914	29.3733	150
	291	da fa	the Dadu River	102.065	29.4047	122
	292	ye le (liu ji )	the Dadu River	102.218	28.9161	500
	293	yao he ba (si ji )	the Dadu River	102.341	29.0899	170
	294	nan gua qiao (san ji )	the Dadu River	102.372	29.1528	28
	295	xi ma gu (dong ji )	the Dadu River	102.377	29.1573	38.6
	296	da dong he bian （yi ji ）	the Dadu River	102.387	29.1983	57.55
	297	jin ping	the Dadu River	102.388	30.5918	85
	298	jin yuan	the Dadu River	102.349	30.5359	65
	299	jin kang	the Dadu River	102.276	30.3611	92
	300	ji niu zha ba	the Dadu River	101.831	30.8979	80.8
	301	ji niu chang fang	the Dadu River	101.879	30.8949	41.33
	302	kui yong gou yi ji	the Dadu River	101.746	30.5893	8
	303	zhu zi gou	the Dadu River	101.776	30.9053	33
	304	bin dong	the Dadu River	102.063	29.2379	60
	305	da jin ping	the Dadu River	102.178	29.2041	45
	306	wan ba he	the Dadu River	102.097	29.1358	20
	307	xiao tian dong	the Dadu River	102.04	30.0955	96
	308	long dong	the Dadu River	102.021	30.0801	30
	309	shang ku ba zhi qu	the Dadu River	101.865	30.1502	119.86
	310	xia chang zhi	the Dadu River	101.918	30.1574	25
	311	jin gai	the Dadu River	101.93	30.1515	34.3
	312	hua shan gou	the Dadu River	101.956	30.4041	98
	313	guan zhou	the Dadu River	102.029	30.9853	103.3
	314	chun tang ba	the Dadu River	102.508	31.0246	19
	315	guan yin yan （hu ）	the Dadu River	103.455	29.6218	8
	316	han niu he	the Dadu River	102.119	30.7603	42.21
	317	cai yang	the Dadu River	102.145	29.6164	50
	318	dong qu	the Yalong River	98.312	33.0487	24
	319	wen bo	the Yalong River	98.6598	32.8653	20
	320	chang xu	the Yalong River	98.9169	32.7549	30
	321	mu neng da	the Yalong River	99.0813	32.5103	24
	322	ren qing ling	the Yalong River	99.1539	32.2883	10
	323	re ba	the Yalong River	99.4095	32.0969	2
	324	a da	the Yalong River	99.6608	31.8437	20
	325	ge ni	the Yalong River	99.7814	31.6919	20
	326	mu luo	the Yalong River	100.093	31.4944	10
	327	ren da	the Yalong River	100.227	31.3466	15
	328	le an	the Yalong River	100.297	31.2044	6
	329	xin long	the Yalong River	100.315	30.9483	25
	330	gong ke	the Yalong River	100.183	30.7404	9
	331	jia xi	the Yalong River	100.34	30.5219	15.25
	332	liang he kou	the Yalong River	101.014	30.1628	12.4
	333	ya gen yi ji	the Yalong River	101.012	30.0755	9
	334	ya gen dong ji	the Yalong River	101.095	29.6524	14.7
	335	leng gu dian zhan	the Yalong River	101.149	29.4278	55.1
	336	leng gu chang fang	the Yalong River	101.131	29.409	35
	337	meng di gou	the Yalong River	101.184	28.9428	25
	338	yang fang gou	the Yalong River	101.199	28.6562	38
	339	ka la	the Yalong River	101.335	28.3639	51.6
	340	jin ping yi ji	the Yalong River	101.633	28.1803	47.7
	341	jin ping dong ji	the Yalong River	101.791	28.1283	37.9
	342	guan di	the Yalong River	101.886	27.8214	35.8
	343	dong tan	the Yalong River	101.781	26.8208	51
	344	tong zi lin	the Yalong River	101.853	26.7127	36.7
	345	teng qiao he kou	the Yalong River	101.812	27.1037	30
	346	xi gu	the Yalong River	101.546	28.9284	45.5
	347	wu yi qiao	the Yalong River	101.627	28.8236	64.49
	348	sha ping	the Yalong River	101.67	28.6918	0
	349	pian qiao	the Yalong River	101.643	28.6548	85
	350	jiang bian	the Yalong River	101.708	28.6029	109.2
	351	xie ka	the Yalong River	101.839	28.9339	108.82
	352	ta ka	the Yalong River	101.822	28.8062	100
	353	shang tong ba	the Yalong River	100.857	28.906	49
	354	ka ji wa	the Yalong River	100.889	28.7084	22.3
	355	sha wan	the Yalong River	100.892	28.4643	33
	356	dong gong bao	the Yalong River	100.877	28.3622	44
	357	li zhou	the Yalong River	100.935	28.0862	25
	358	cha ma ri dong	the Yalong River	100.285	29.8788	8
	359	long guo	the Yalong River	100.337	29.6999	4
	360	mu la	the Yalong River	100.559	29.6903	4
	361	ni mu	the Yalong River	100.668	29.4701	3
	362	shu lu ya zha	the Yalong River	100.722	29.3564	10
	363	que ru dong	the Yalong River	100.835	29.1363	15
	364	jue luo	the Yalong River	101.417	29.6716	34.5
	365	jin ding zha zhi	the Yalong River	101.267	29.4333	46.7
	366	jin ding chang zhi	the Yalong River	101.181	29.4067	60
	367	bu xi	the Yalong River	101.231	28.1846	16
	368	yan gang	the Yalong River	101.297	28.1618	21
	369	ji ke	the Yalong River	100.282	31.957	3.6
	370	xia wa	the Yalong River	100.394	31.8159	5
	371	ji zha	the Yalong River	100.412	31.7797	8
	372	ka niang	the Yalong River	100.403	31.7414	5
	373	jin da	the Yalong River	100.446	31.7124	8
	374	guan men liang zha zhi	the Yalong River	100.562	31.6493	3
	375	guan men liang chang zhi	the Yalong River	100.592	31.5616	6
	376	zhen dong	the Yalong River	100.63	31.5265	8
	377	zhu ba zha zhi	the Yalong River	100.681	31.5138	8
	378	zhu ba chang zhi	the Yalong River	100.695	31.434	10
	379	zhu ba	the Yalong River	100.702	31.5085	10
	380	wa da	the Yalong River	100.741	31.3313	25
	381	beng long zha zhi	the Yalong River	100.92	31.1401	20
	382	beng long chang zhi	the Yalong River	101.077	31.0238	25
	383	ya tuo	the Yalong River	101.029	31.0609	25
	384	cai zi po	the Yalong River	101.08	31.0122	25
	385	da lan cun ba zhi 1	the Yalong River	101.111	30.9169	3
	386	da lan cun ba zhi 1	the Yalong River	101.121	30.949	25
	387	ya cun	the Yalong River	101.111	30.8502	10
	388	ba ru san ji	the Yalong River	101.955	27.8548	12
	389	xi chang da qiao yi ji	the Yalong River	101.973	27.8807	10
	390	ga liu he san ji	the Yalong River	101.878	27.9922	8
	391	jia mi yi ji	the Yalong River	101.091	27.4015	35.15
	392	jia mi dong ji	the Yalong River	101.039	27.5111	10.5
	393	wo luo qiao	the Yalong River	101.129	27.6325	6.5
	394	san yan long	the Yalong River	101.276	28.7729	45
	395	fang ma ping yi ji	the Yalong River	101.216	29.1391	30
	396	fang ma ping dong ji	the Yalong River	101.178	29.1016	30
	397	shang tuan	the Yalong River	101.269	29.0358	60
	398	zi ga	the Yalong River	101.232	29.0396	60
	399	xiao meng di gou	the Yalong River	101.184	28.952	60
	400	da kong	the Yalong River	101.158	29.0569	60
	401	mian ning da qiao	the Yalong River	102.213	28.6704	350
	402	yu long	the Yalong River	99.2412	31.9264	14.6
	403	rong cha	the Yalong River	99.346	31.8581	12.2
	404	rong cha	the Yalong River	99.4399	31.8072	18
	405	xia luo	the Yalong River	99.4986	31.8017	12.2
	406	luo xia	the Yalong River	99.5846	31.8166	12.3
	407	ce fang	the Jinsha River	97.0175	33.2685	10
	408	chan gu	the Jinsha River	97.0475	32.9112	20
	409	xie ma	the Jinsha River	95.3542	34.4732	20
	410	tong jia	the Jinsha River	96.4006	33.7156	10.1
	411	xi rong	the Jinsha River	97.3773	32.8853	25
	412	shai la	the Jinsha River	97.426	32.726	10
	413	guo tong	the Jinsha River	97.6951	32.5436	15
	414	gang tuo	the Jinsha River	98.582	31.6361	23
	415	yan bi	the Jinsha River	98.7983	31.457	30
	416	bo luo	the Jinsha River	98.6022	31.1873	12
	417	ye ba tan	the Jinsha River	98.9566	30.722	15
	418	ba tang	the Jinsha River	99.0507	29.9763	55.55
	419	la wa	the Jinsha River	99.0109	30.1288	55
	420	su wa long	the Jinsha River	99.0647	29.4277	91.2
	421	chang bo	the Jinsha River	99.1076	29.2514	84
	422	xu long	the Jinsha River	99.1313	28.7385	50
	423	ben zi lan	the Jinsha River	99.2695	28.302	42
	424	tuo ding	the Jinsha River	99.4302	27.773	50
	425	qi zong	the Jinsha River	99.5521	27.559	120
	426	ta cheng	the Jinsha River	99.5653	27.4886	100.6
	427	shang jiang	the Jinsha River	99.6156	27.3928	206
	428	jin zhuang	the Jinsha River	99.8162	27.1541	202
	429	hong yan	the Jinsha River	99.9574	26.9423	250
	430	shi gu	the Jinsha River	99.9574	26.9198	172
	431	long pan	the Jinsha River	100.064	27.0795	110
	432	shang xia kou	the Jinsha River	100.109	27.1827	50
	433	xia xia kou	the Jinsha River	100.196	27.2893	50
	434	hu tiao xia	the Jinsha River	100.078	27.1684	50
	435	liang jia ren	the Jinsha River	100.06	27.1475	62.8
	436	li yuan	the Jinsha River	100.292	27.6761	15.5
	437	a hai	the Jinsha River	100.506	27.3506	17.34
	438	jin an qiao	the Jinsha River	100.446	26.8089	18
	439	long kai kou	the Jinsha River	100.414	26.5306	43.1
	440	lu di la	the Jinsha River	100.817	26.2011	22
	441	guan yin yan	the Jinsha River	101.438	26.5214	24.02
	442	long jie	the Jinsha River	101.862	25.9629	60
	443	jin sha	the Jinsha River	101.649	26.5761	45
	444	wu dong de	the Jinsha River	102.63	26.3339	80.07
	445	bai he tan	the Jinsha River	102.9	27.2036	59
	446	xi luo dong	the Jinsha River	103.646	28.2644	40
	447	xiang jia ba	the Jinsha River	104.46	28.6408	80
	448	bu tuo feng jia ping jin sha jiang te da qiao	the Jinsha River	102.905	27.333	30
	449	yu zha	the Jinsha River	101.928	26.3625	50
	450	pu he jin sha jiang te da qiao	the Jinsha River	104.551	28.6923	40
	451	jin jiang jie	the Jinsha River	100.548	26.2217	50
	452	qiao jia xian cheng	the Jinsha River	102.921	26.8978	300
	453	long jie xiang	the Jinsha River	101.882	25.9594	101.21
	454	pan zhi hua jin sha jiang da qiao	the Jinsha River	101.843	26.5752	14
	455	yu pao jiang san ji	the Jinsha River	100.915	26.0844	25
	456	tie chuan qiao	the Jinsha River	100.915	26.0845	12
	457	luo gu	the Jinsha River	102.922	27.9485	20
	458	di luo	the Jinsha River	103.058	27.7002	5.7
	459	qing song	the Jinsha River	103.052	27.5693	6.4
	460	liu hong	the Jinsha River	103.217	28.1286	20
	461	ping tou	the Jinsha River	103.281	28.0562	30.2
	462	da jiu	the Jinsha River	102.601	27.8195	11
	463	zuan gen	the Jinsha River	100.525	28.616	9
	464	gu di	the Jinsha River	100.578	28.5006	24
	465	bo wa	the Jinsha River	100.546	28.0991	27
	466	ning lang	the Jinsha River	100.514	28.0314	47.75
	467	jin han la zha	the Jinsha River	100.209	27.7996	39.5
	468	mu xing tu	the Jinsha River	100.234	27.8008	15
	469	da wa long ba zhi	the Jinsha River	100.482	28.8211	22.8
	470	da wa long chang zhi	the Jinsha River	100.584	28.7884	50
	471	ri huo yi ji	the Jinsha River	100.546	29.0343	41
	472	gu wa	the Jinsha River	99.8892	29.2721	11.95
	473	dong song	the Jinsha River	99.8113	28.9151	15
	474	zheng dong	the Jinsha River	99.5463	29.1383	30
	475	gu xue zha zhi	the Jinsha River	99.3012	28.5978	27.5
	476	gu xue chang zhi	the Jinsha River	99.2539	28.4784	42
	477	da yan dong	the Jinsha River	103.724	26.8528	11.8
	478	xiang bi ling	the Jinsha River	103.663	27.0386	7
	479	xiao yan tou	the Jinsha River	103.635	27.0135	10
	480	hong shi yan	the Jinsha River	103.417	27.0275	29
	481	tian hua ban	the Jinsha River	103.293	27.026	10
	482	dong tan kou	the Jinsha River	103.235	27.1512	36
	483	huang jiao shu	the Jinsha River	103.226	27.2988	58
	484	de ze	the Jinsha River	103.602	25.9477	10
	485	xiao zhong dian	the Jinsha River	99.7818	27.5763	40
	486	ji sha	the Jinsha River	99.8335	27.4591	7
	487	diao jiang yan	the Jinsha River	99.9916	27.3082	15
	488	chong jiang he (kuo rong )	the Jinsha River	99.9724	27.3343	6
	489	luo si wan	the Jinsha River	99.9916	27.3081	5.74
	490	gao qiao	the Jinsha River	103.741	27.7121	12.03
	491	yan zi po	the Jinsha River	104.266	28.3175	20
	492	yang liu tan	the Jinsha River	104.248	28.5122	19
	493	fu long kou	the Jinsha River	104.417	28.5992	25
	494	bai shui jiang san ji	the Jinsha River	104.236	27.9862	12.8
	495	xiao peng zu	the Jinsha River	102.647	25.5369	10
	496	qian chang	the Jinsha River	102.718	25.8853	14
	497	lu ji chang	the Jinsha River	102.718	25.8853	42
	498	jia yan	the Jinsha River	102.757	26.1495	10.42
	499	sai zhu	the Jinsha River	102.742	25.9029	19
	500	yu pao jiang san ji	the Jinsha River	100.915	26.0845	23
	501	bai shui he dong ji ba	the Jinsha River	100.257	27.123	5
	502	dong yi	the Jinsha River	100.209	28.2199	47.7
	503	se ku	the Jinsha River	100.337	28.0141	24.18
	504	yi di	the Jinsha River	100.451	27.9211	37.3
	505	zhan he	the Jinsha River	100.915	26.8873	20
	506	shui jing	the Jinsha River	100.639	26.8849	7
	507	gang qu he yi ji	the Jinsha River	99.6108	28.2688	10
	508	gang qu he dong ji	the Jinsha River	99.3902	28.181	67.9
	509	dan da he	the Jinsha River	99.0437	28.9683	25
	510	luo han ping	the Jinsha River	104.058	28.3825	38
	511	ru mei	the Lancang River	98.3516	29.6305	13.3
	512	cha long tong	the Lancang River	96.5649	32.5947	12
	513	gu shui	the Lancang River	98.7556	28.6045	20
	514	wu nong long	the Lancang River	98.9336	27.9285	21
	515	li di	the Lancang River	99.0334	27.839	30
	516	tuo ba	the Lancang River	99.1519	27.1758	10
	517	huang deng	the Lancang River	99.1142	26.5542	34
	518	da hua qiao	the Lancang River	99.1271	26.1772	20
	519	miao wei	the Lancang River	99.1607	25.8628	15
	520	gong guo qiao	the Lancang River	99.2512	25.717	34
	521	xiao wan	the Lancang River	100.093	24.7022	21
	522	man wan	the Lancang River	100.449	24.6222	7
	523	da chao shan	the Lancang River	100.369	24.0244	17.52
	524	nuo zha dong	the Lancang River	100.418	22.6561	31.26
	525	jing hong	the Lancang River	100.765	22.0525	16.38
	526	gan lan ba	the Lancang River	100.912	21.8747	20
	527	cha ri kou	the Lancang River	96.6035	32.5315	25
	528	le zhu	the Lancang River	97.2771	30.8326	37
	529	wa tuo	the Lancang River	97.2977	30.8337	2
	530	jin he ba zhi	the Lancang River	97.3335	30.8038	8
	531	jin he chang zhi	the Lancang River	97.3448	30.8049	28
	532	yang dong	the Lancang River	100.032	25.5609	15.2
	533	xu cun	the Lancang River	99.9944	25.4189	21
	534	liu wu he dong ji	the Lancang River	99.7641	25.5273	3
	535	xi dong he dong ji	the Lancang River	100.132	25.5591	13.5
	536	wei yuan jiang	the Lancang River	100.563	23.2764	0
	537	luo zha he dong ji	the Lancang River	100.453	24.5019	12
	538	jue ba	the Lancang River	98.2775	29.4347	20
	539	gu jiu nong	the Lancang River	98.9565	28.4452	60
	540	cha long	he Nujiang River	92.3323	31.4516	4
	541	sha ding	he Nujiang River	94.4874	31.2582	15
	542	re yu	he Nujiang River	95.1503	31.1548	15
	543	luo he	he Nujiang River	95.4546	31.0755	15
	544	xin rong	he Nujiang River	95.7682	30.9467	15
	545	tong ka	he Nujiang River	96.675	30.4538	39
	546	ka xi	he Nujiang River	96.8864	30.2423	40
	547	nu jiang qiao	he Nujiang River	97.1917	30.1055	20
	548	ye ba	he Nujiang River	97.383	29.8768	15
	549	la long	he Nujiang River	97.5543	29.5685	15
	550	luo la	he Nujiang River	97.909	29.2944	15
	551	ang qu	he Nujiang River	98.0359	29.0566	15
	552	dong mi	he Nujiang River	98.2902	28.7573	15
	553	song ta	he Nujiang River	98.4833	28.1667	82.6
	554	ma ji	he Nujiang River	98.8343	27.456	27.2
	555	lu ma deng	he Nujiang River	98.8721	27.057	28.37
	556	fu gong	he Nujiang River	98.8606	26.9448	40.77
	557	bi jiang	he Nujiang River	98.9005	26.4788	33
	558	ya bi luo	he Nujiang River	98.8637	26.2952	30
	559	lu shui	he Nujiang River	98.858	25.8441	27.56
	560	liu ku	he Nujiang River	98.8424	25.8758	35.16
	561	shi tou zhai	he Nujiang River	98.8792	25.5867	22.58
	562	sai ge	he Nujiang River	98.8456	25.1028	44.3
	563	yan sang shu	he Nujiang River	98.9929	24.4095	10
	564	guang po	he Nujiang River	99.1828	24.312	12.5
	565	di ma luo he	he Nujiang River	98.6998	27.9184	60
	566	hong tu tian shui	he Nujiang River	98.9544	25.6414	20
	567	tian shui chang fang	he Nujiang River	98.9267	25.6381	20
	568	zha la	he Nujiang River	98.4746	28.7676	6
	569	san cha he	he Nujiang River	100.02	26.2611	8
	570	feng wei he	he Nujiang River	99.0047	23.8762	24.3
	571	da ya kou	he Nujiang River	98.9403	23.6827	20.7
	572	pan he kou	he Nujiang River	99.9266	24.1176	17.5
	573	mi jiao he yi ji 1hao ba	he Nujiang River	98.758	27.5566	3
	574	mi jiao he yi ji 2hao ba	he Nujiang River	98.7581	27.5522	3
	575	mi jiao he yi ji chang fang	he Nujiang River	98.7904	27.5712	4
	576	ya yang shan	the Lixian River	101.397	23.0989	27
	577	shi men kan	the Lixian River	101.504	23.0194	5
	578	long ma	the Lixian River	101.649	22.8725	17.06
	579	ge lan tan	the Lixian River	102.059	22.7	10
	580	tu ka he	the Lixian River	102.276	22.6121	10
	581	pu xi qiao	the Lixian River	101.609	23.1405	12.6
	582	si nan jiang	the Lixian River	101.874	23.0913	6
	583	feng wei he	the Lixian River	99.0047	23.8762	24.3
	584	ya dong he	the Lixian River	102.678	23.2384	9
	585	long jiang yi ji	the Irrawaddy River	98.6508	25.1545	7
	586	teng long qiao yi ji	the Irrawaddy River	98.6392	24.784	15
	587	teng long qiao dong ji	the Irrawaddy River	98.6645	24.6783	15
	588	la zhai	the Irrawaddy River	98.6271	24.6354	10
	589	deng ke	the Irrawaddy River	98.5224	24.6565	10
	590	zhe mao	the Irrawaddy River	98.1119	24.2376	15
	591	san cha he	the Irrawaddy River	98.2149	25.4279	3
	592	hou qiao	the Irrawaddy River	98.1977	25.2613	16.98
	593	su jia he kou	the Irrawaddy River	98.1894	25.2044	10
	594	da qiao	the Nanpan River	103.64	23.9805	22.76
	595	lei da tan	the Nanpan River	103.709	24.1999	15.09
	596	yun peng	the Nanpan River	103.988	24.4357	15.92
	597	feng huang gu	the Nanpan River	104.164	24.4775	13.3
	598	tian sheng qiao yi ji	the Nanpan River	105.091	24.7903	25.61
	599	lu bu ge	the Nanpan River	104.582	24.8632	4
	600	nuo zu	the Nanpan River	103.107	24.4721	21
	601	xiao long tan	the Nanpan River	104.533	24.4296	8
	602	chai shi tan	the Nanpan River	103.338	24.9943	8
	603	ga sa jiang yi ji	the Yuanjiang River	101.503	24.1781	34.3
	604	nan sha	the Yuanjiang River	102.856	23.2274	36
	605	da wan	the Yuanjiang River	101.311	24.5232	30
	606	gun peng yang	the Yuanjiang River	97.734	24.9934	2
	607	peng cuo lin	the Yarlung Tsangpo river	87.9983	29.3744	140
	608	ta ma	the Yarlung Tsangpo river	88.4265	29.3148	120
	609	ka re	the Yarlung Tsangpo river	90.4176	29.2544	50
	610	zhi kong	the Yarlung Tsangpo river	91.8812	29.9605	180
	611	pang dong	the Yarlung Tsangpo river	91.4138	30.1408	420
	612	ba yu	the Yarlung Tsangpo river	92.3316	29.2241	34
	613	da gu	the Yarlung Tsangpo river	92.3999	29.249	36
	614	jie xu	the Yarlung Tsangpo river	92.4544	29.2561	23
	615	cang mu	the Yarlung Tsangpo river	92.4984	29.2183	45.1
	616	jia cha	the Yarlung Tsangpo river	92.5271	29.1401	89
	617	leng da	the Yarlung Tsangpo river	92.715	29.1017	149
	618	zhong da	the Yarlung Tsangpo river	92.8355	29.0712	127.6
	619	zha xue	the Yarlung Tsangpo river	91.8157	30.0444	200
	620	shi quan he	the Yarlung Tsangpo river	80.1581	32.519	84
	621	lao hu zui	the Yarlung Tsangpo river	93.6578	29.8948	206.5
	622	xue ka	the Yarlung Tsangpo river	93.6947	29.9639	101
	623	da ga	the Yarlung Tsangpo river	88.3967	29.1821	40.89
	624	la luo	the Yarlung Tsangpo river	88.5216	28.871	14.4
	625	dong bu	the Yarlung Tsangpo river	94.1547	29.743	359.3
	626	jin qiao	the Yarlung Tsangpo river	93.9059	30.5316	80
	627	man la	the Yarlung Tsangpo river	89.8331	28.8426	28
	628	jiang xiong	the Yarlung Tsangpo river	91.1088	29.1338	72.31
	629	zhuo yu	the Yarlung Tsangpo river	91.2692	29.0995	50
	630	qia yang	the Yarlung Tsangpo river	88.439	28.3292	18.7
	631	wo ka he yi ji	the Yarlung Tsangpo river	92.2109	29.2966	7
	632	chu song	the Yarlung Tsangpo river	89.1594	28.8093	35
